# Supplementary material
Source: Springer Nature journal article supplement (https://www.springermedizin.de/resource/supplementary/12967_2013_1572_MOESM1_ESM.pdf/9574364)
Supplement: MOESM1 [file 9574364]

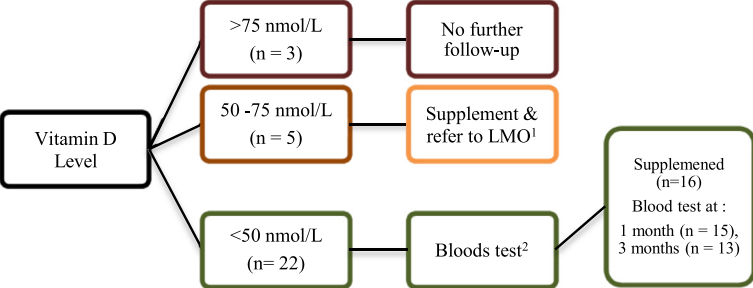

**Criteria:** Male (>18, <50), Female (>18, premenopause), Body Mass Index (BMI) <30, no infection, autoimmunity or malabsorption. <sup>1</sup>*LMO: Local Medical Officer.* <sup>2</sup>**Bloods:** FBC, LFT, PTH, Ca/PO<sub>4</sub>, CRP, ESR, TSH, Coeliac screen, 20 mls of Li-Hep blood for PBMCs
